# Supplementary material
Source: PubMed Central journal article supplement (PMC4417382)

**Supplementary Fig. S1:** Quantitation of *CXCR4* mRNA by real-time PCR in PC-3 cells after 6-or 12-hour treatment with DMSO (control) or the indicated ITC compound (2.5 or 5  $\mu\text{mol/L}$ ). Results shown are mean  $\pm$  SD ( $n = 6$ ). <sup>a</sup>Significantly different ( $P < 0.05$ ) compared with DMSO-treated control by one-way ANOVA with Dunnett's adjustment. Each experiment was repeated at least twice.

Supplementary Figure S1

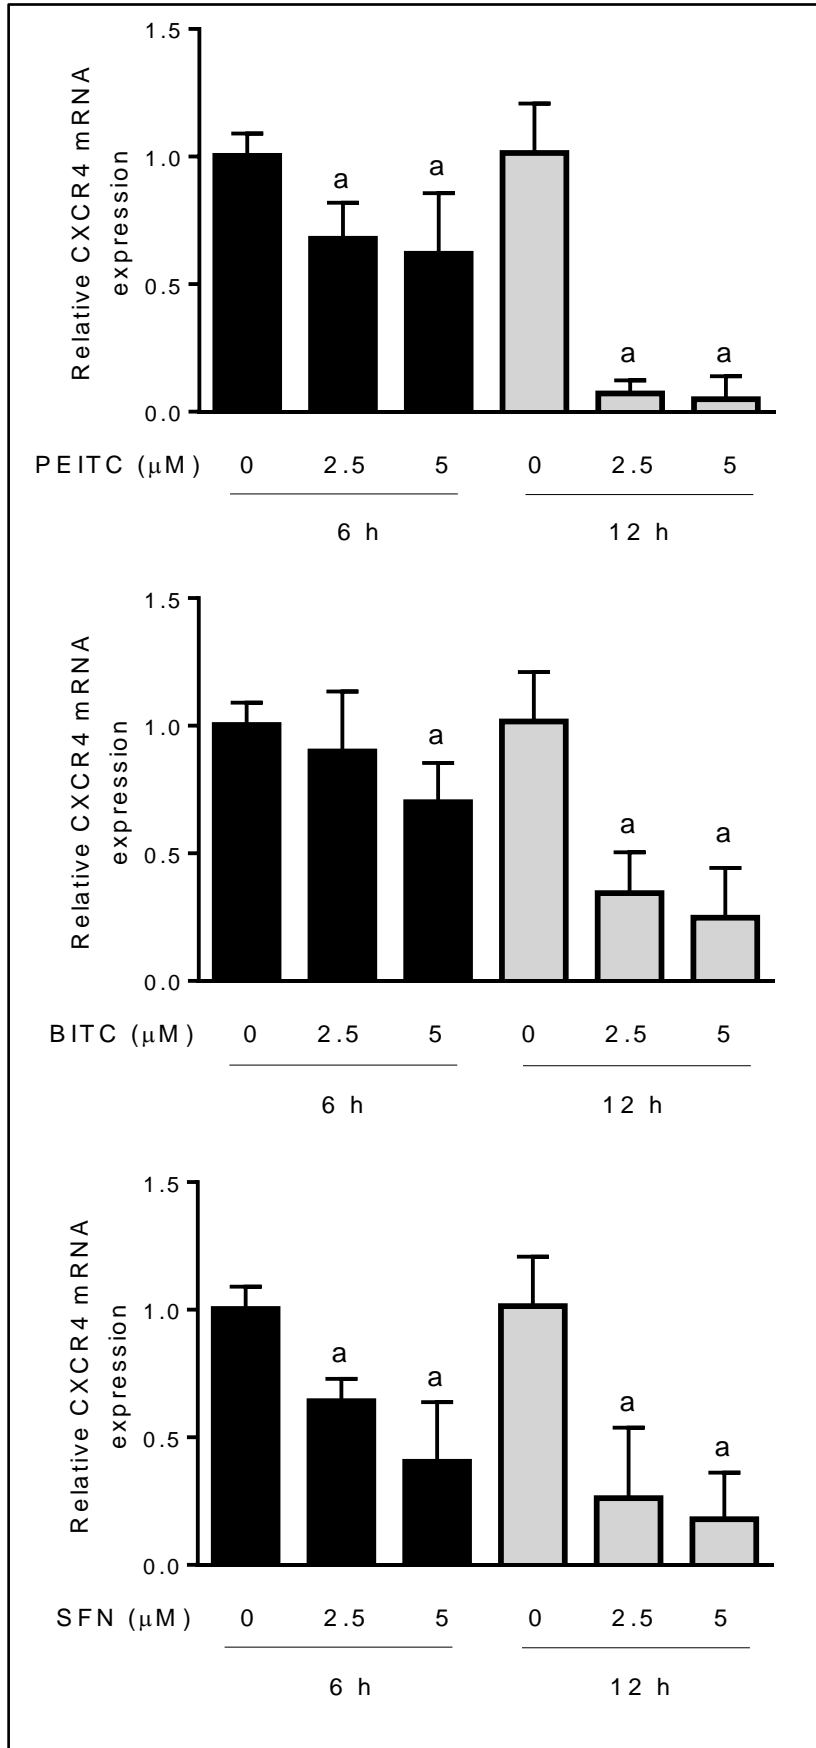

Supplement: NIHMS668856-supplement-01.pdf [file NIHMS668856-supplement-01.pdf]
